# Supplementary material
Source: ML conference proceedings conference paper supplement (https://openaccess.thecvf.com/content/CVPR2026/html/Wu_Geometry-Aligned_and_Anomaly-Aware_CVPR_2026_paper.html)
Supplement: Supplementary file 1 [file Wu_Geometry-Aligned_and_Anomaly-Aware_CVPR_2026_supplemental.pdf]

# Geometry-Aligned and Anomaly-Aware Reconstruction for 3D Anomaly Detection

Linchun Wu<sup>1</sup> Qin Zou<sup>1,\*</sup> Yuanhan Yue<sup>2</sup> Zhongyuan Wang<sup>1</sup>  
<sup>1</sup>Wuhan University, China <sup>2</sup>East China Jiaotong University, China  
 {linchun.wu, qzou, wzy}@whu.edu.cn, yhyue@ecjtu.edu.cn

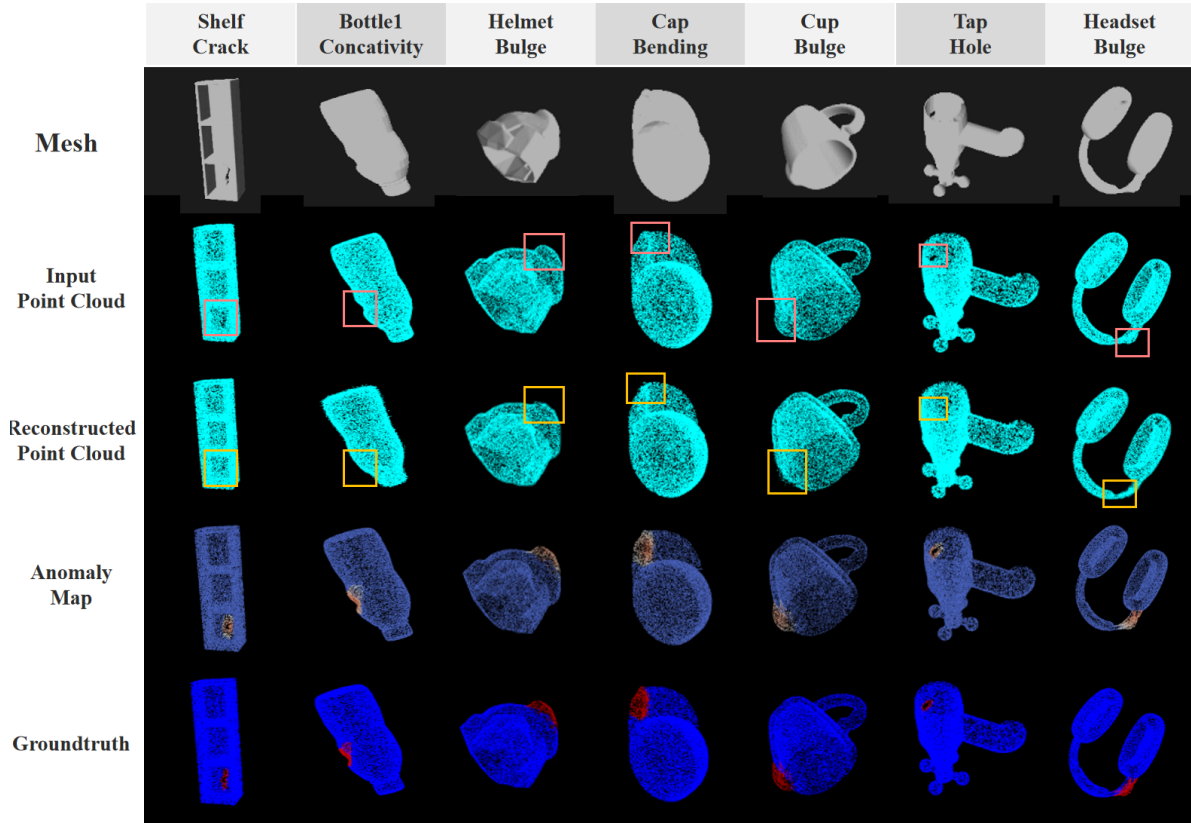

Figure 1. Further reconstruction and detection results of the proposed method on Anomaly-ShapeNet Datasets.

## Appendix

**Anomaly Synthesis.** For anomaly generation, we leverage the off-shelf algorithm DA-Gen from MC4AD as an auxiliary augmentation module. DA-Gen simulates directional defective forces  $\mathbf{F}_D$  by perturbing surface normals with controlled randomness to mimic realistic pseudo-anomalies such as scratches and surface distortions. Formally, for each local patch  $\hat{\mathbf{P}}_i$ , the deformation field is defined as:

$$\mathbf{F}_{D,i} = [\beta_i \cdot \lambda_i \cdot \boldsymbol{\nu}_i + (1 - \lambda_i) \cdot \boldsymbol{\eta}_i] \cdot \gamma_i \cdot \frac{\pi_i}{\max(\pi_i)} \cdot (1 - \sigma_i |\pi_i|), \quad (1)$$

where  $\boldsymbol{\nu}_i$  is the surface normal of the  $i$ -th patch,  $\boldsymbol{\eta}_i$  a randomized direction, and  $\beta_i \in \{-1, 1\}$  controls the displacement polarity.  $\lambda_i$ ,  $\gamma_i$ , and  $\sigma_i$  regulate the contribution of normal perturbation, displacement magnitude, and defect elongation, respectively. This formulation allows DA-Gen to generate diverse, geometry-consistent anomalies that enhance the robustness of 3D anomaly detection.

**Further Visual Proof.** We included an extra visual demonstration of our reconstruction and detection results on Anomaly-ShapeNet datasets, please see Figure 1.

**P-AUROC on Anomaly Shapenet Dataset.** We further provide an extra table of our detection results P-AUROC on Anomaly

Table 1. P-AUROC performance of different methods on Anomaly-ShapeNet across 40 categories, where best and second-place results are highlighted in **red** and **blue**, respectively.

| P-AUROC                                   |              |              |              |              |              |              |              |              |              |              |              |              |              |              |
|-------------------------------------------|--------------|--------------|--------------|--------------|--------------|--------------|--------------|--------------|--------------|--------------|--------------|--------------|--------------|--------------|
| Method                                    | ashtray0     | bag0         | bottle0      | bottle1      | bottle3      | bow10        | bow11        | bow12        | bow13        | bow14        | bow15        | bucket0      | bucket1      | cap0         |
| BTF(Raw)(CVPR23 <sup>*</sup> )            | 0.512        | 0.430        | 0.551        | 0.491        | 0.720        | 0.524        | 0.464        | 0.426        | 0.685        | 0.563        | 0.517        | 0.617        | 0.686        | 0.524        |
| BTF(FPFH)(CVPR23 <sup>*</sup> )           | 0.624        | 0.746        | 0.641        | 0.549        | 0.622        | 0.710        | 0.768        | 0.518        | 0.590        | 0.679        | 0.699        | 0.401        | 0.633        | 0.730        |
| M3DM(CVPR23 <sup>*</sup> )                | 0.577        | 0.637        | 0.663        | 0.637        | 0.532        | 0.658        | 0.663        | 0.694        | 0.657        | 0.624        | 0.489        | 0.698        | 0.699        | 0.531        |
| PatchCore(FPFH)(CVPR22 <sup>*</sup> )     | 0.597        | 0.574        | 0.654        | 0.687        | 0.512        | 0.524        | 0.531        | 0.625        | 0.327        | 0.720        | 0.358        | 0.459        | 0.571        | 0.472        |
| PatchCore(PointMAE)(CVPR22 <sup>*</sup> ) | 0.495        | 0.674        | 0.553        | 0.606        | 0.653        | 0.527        | 0.524        | 0.515        | 0.581        | 0.501        | 0.562        | 0.586        | 0.574        | 0.544        |
| CPMF(PR24 <sup>*</sup> )                  | 0.615        | 0.655        | 0.521        | 0.571        | 0.435        | 0.745        | 0.488        | 0.635        | 0.641        | 0.683        | 0.684        | 0.486        | 0.601        | 0.601        |
| Reg3D-AD(NeurIPS23 <sup>*</sup> )         | 0.698        | 0.715        | 0.886        | 0.696        | 0.525        | 0.775        | 0.615        | 0.593        | 0.654        | 0.800        | 0.691        | 0.619        | 0.752        | 0.632        |
| IMRNet(CVPR24 <sup>*</sup> )              | 0.671        | 0.668        | 0.556        | 0.702        | 0.641        | 0.781        | 0.705        | 0.684        | 0.599        | 0.576        | 0.715        | 0.585        | 0.774        | 0.715        |
| ISMP(AAAI25 <sup>*</sup> )                | 0.865        | 0.734        | 0.722        | <b>0.869</b> | 0.740        | 0.762        | 0.702        | 0.706        | 0.851        | 0.753        | 0.733        | 0.545        | 0.683        | 0.672        |
| PO3AD (CVPR <sup>*</sup> 25)              | <b>0.962</b> | <b>0.949</b> | 0.912        | 0.844        | 0.880        | <b>0.978</b> | 0.914        | 0.918        | 0.935        | 0.967        | 0.941        | 0.755        | 0.899        | 0.957        |
| MC4AD                                     | 0.904        | <b>0.957</b> | <b>0.942</b> | <b>0.881</b> | <b>0.896</b> | <b>0.977</b> | <b>0.921</b> | <b>0.965</b> | <b>0.937</b> | <b>0.993</b> | <b>0.952</b> | <b>0.792</b> | <b>0.925</b> | <b>0.959</b> |
| Ours                                      | <b>0.971</b> | 0.931        | <b>0.955</b> | <b>0.927</b> | <b>0.934</b> | 0.973        | <b>0.982</b> | <b>0.966</b> | <b>0.958</b> | <b>0.981</b> | <b>0.977</b> | <b>0.882</b> | <b>0.951</b> | <b>0.960</b> |
| Method                                    | cap3         | cap4         | cap5         | cup0         | cup1         | eraser0      | headset0     | headset1     | helmet0      | helmet1      | helmet2      | helmet3      | jar0         | micro.0      |
| BTF(Raw)(CVPR23 <sup>*</sup> )            | 0.687        | 0.469        | 0.373        | 0.632        | 0.561        | 0.637        | 0.578        | 0.475        | 0.504        | 0.449        | 0.605        | 0.700        | 0.423        | 0.583        |
| BTF(FPFH)(CVPR23 <sup>*</sup> )           | 0.658        | 0.524        | 0.586        | 0.790        | 0.619        | 0.719        | 0.620        | 0.591        | 0.575        | 0.749        | 0.643        | 0.724        | 0.427        | 0.675        |
| M3DM(CVPR23 <sup>*</sup> )                | 0.605        | 0.718        | 0.655        | 0.715        | 0.556        | 0.710        | 0.581        | 0.585        | 0.599        | 0.427        | 0.623        | 0.655        | 0.541        | 0.358        |
| PatchCore(FPFH)(CVPR22 <sup>*</sup> )     | 0.653        | 0.595        | 0.795        | 0.655        | 0.596        | 0.810        | 0.583        | 0.464        | 0.548        | 0.489        | 0.455        | 0.737        | 0.478        | 0.488        |
| PatchCore(PointMAE)(CVPR22 <sup>*</sup> ) | 0.488        | 0.725        | 0.545        | 0.510        | 0.856        | 0.378        | 0.575        | 0.423        | 0.580        | 0.562        | 0.651        | 0.615        | 0.487        | <b>0.886</b> |
| CPMF(PR24 <sup>*</sup> )                  | 0.551        | 0.553        | 0.551        | 0.497        | 0.509        | 0.689        | 0.699        | 0.458        | 0.555        | 0.542        | 0.515        | 0.520        | 0.611        | 0.545        |
| Reg3D-AD(NeurIPS23 <sup>*</sup> )         | 0.718        | <b>0.815</b> | 0.467        | 0.685        | 0.698        | 0.755        | 0.580        | 0.626        | 0.600        | 0.624        | 0.825        | 0.620        | 0.599        | 0.599        |
| IMRNet(CVPR24 <sup>*</sup> )              | 0.706        | 0.753        | 0.742        | 0.643        | 0.688        | 0.548        | 0.705        | 0.476        | 0.598        | 0.604        | 0.644        | 0.663        | 0.765        | 0.742        |
| ISMP(AAAI25 <sup>*</sup> )                | 0.775        | 0.661        | 0.770        | 0.552        | 0.851        | 0.524        | 0.472        | 0.843        | 0.615        | 0.603        | 0.568        | 0.522        | 0.661        | 0.600        |
| PO3AD (CVPR25 <sup>*</sup> )              | <b>0.948</b> | <b>0.940</b> | 0.864        | 0.909        | <b>0.932</b> | <b>0.974</b> | <b>0.823</b> | 0.907        | <b>0.878</b> | <b>0.948</b> | <b>0.932</b> | 0.846        | 0.871        | 0.810        |
| MC4AD                                     | 0.946        | <b>0.940</b> | <b>0.925</b> | <b>0.917</b> | 0.920        | 0.951        | 0.780        | <b>0.932</b> | <b>0.885</b> | <b>0.926</b> | <b>0.874</b> | <b>0.879</b> | <b>0.877</b> | 0.833        |
| Ours                                      | <b>0.962</b> | <b>0.968</b> | <b>0.949</b> | <b>0.945</b> | <b>0.957</b> | <b>0.970</b> | <b>0.866</b> | <b>0.967</b> | 0.862        | 0.907        | 0.861        | <b>0.892</b> | <b>0.905</b> | <b>0.864</b> |
| Method                                    | shelf0       | tap0         | tap1         | vase0        | vase1        | vase2        | vase3        | vase4        | vase5        | vase7        | vase8        | vase9        | Average      | Mean Rank    |
| BTF(Raw)(CVPR23 <sup>*</sup> )            | 0.464        | 0.527        | 0.564        | 0.618        | 0.549        | 0.403        | 0.602        | 0.613        | 0.585        | 0.578        | 0.550        | 0.564        | 0.550        | 8.675        |
| BTF(FPFH)(CVPR23 <sup>*</sup> )           | 0.619        | 0.568        | 0.596        | 0.642        | 0.619        | 0.646        | 0.699        | 0.710        | 0.429        | 0.540        | 0.662        | 0.568        | 0.628        | 6.525        |
| M3DM(CVPR23 <sup>*</sup> )                | 0.554        | 0.654        | 0.712        | 0.608        | 0.602        | 0.737        | 0.658        | 0.655        | 0.642        | 0.517        | 0.551        | 0.663        | 0.616        | 6.850        |
| PatchCore(FPFH)(CVPR22 <sup>*</sup> )     | 0.613        | 0.733        | 0.768        | 0.655        | 0.453        | 0.721        | 0.430        | 0.505        | 0.447        | 0.693        | 0.575        | 0.663        | 0.580        | 7.800        |
| PatchCore(PointMAE)(CVPR22 <sup>*</sup> ) | 0.543        | <b>0.858</b> | 0.541        | 0.677        | 0.551        | 0.742        | 0.465        | 0.523        | 0.572        | 0.651        | 0.364        | 0.423        | 0.577        | 7.950        |
| CPMF(PR24 <sup>*</sup> )                  | 0.783        | 0.458        | 0.657        | 0.458        | 0.486        | 0.582        | 0.582        | 0.514        | 0.651        | 0.504        | 0.529        | 0.545        | 0.573        | 8.450        |
| Reg3D-AD(NeurIPS23 <sup>*</sup> )         | 0.688        | 0.589        | 0.741        | 0.548        | 0.602        | 0.405        | 0.511        | 0.755        | 0.624        | 0.881        | 0.811        | 0.694        | 0.668        | 5.375        |
| IMRNet(CVPR24 <sup>*</sup> )              | 0.605        | 0.681        | 0.699        | 0.535        | 0.685        | 0.614        | 0.401        | 0.524        | 0.682        | 0.593        | 0.635        | 0.691        | 0.650        | 5.800        |
| ISMP(AAAI25 <sup>*</sup> )                | 0.701        | 0.844        | 0.678        | 0.687        | 0.534        | 0.773        | 0.622        | 0.546        | 0.580        | 0.747        | 0.736        | 0.823        | 0.691        | 5.150        |
| PO3AD (CVPR25 <sup>*</sup> )              | 0.663        | 0.783        | 0.692        | 0.955        | 0.882        | 0.978        | <b>0.884</b> | <b>0.902</b> | <b>0.937</b> | <b>0.982</b> | 0.950        | 0.952        | 0.898        | 2.735        |
| MC4AD                                     | <b>0.810</b> | 0.798        | <b>0.777</b> | <b>0.969</b> | <b>0.889</b> | <b>0.990</b> | 0.882        | 0.875        | 0.933        | <b>0.995</b> | <b>0.953</b> | <b>0.959</b> | <b>0.910</b> | <b>2.125</b> |
| Ours                                      | <b>0.891</b> | <b>0.857</b> | <b>0.826</b> | <b>0.983</b> | <b>0.924</b> | <b>0.988</b> | <b>0.936</b> | <b>0.936</b> | <b>0.962</b> | 0.985        | <b>0.971</b> | <b>0.987</b> | <b>0.936</b> | <b>1.425</b> |

Shapenet Dataset, our framework averagely outperform the state of the art method by 2% as shown in Table 1.

**Normal Reference Impact.** For different reference qualities as in Table 2, reconstruction performance degrades with decreasing reference accuracy, while remaining robust within the top- $k$  range.

Table 2. Ablation of different retrieval conditions on Real3D-AD.

| Metric                 | (Ours)       | Top- $k$ ( $k = 5$ ) | Random | Mismatched |
|------------------------|--------------|----------------------|--------|------------|
| O-AUROC ( $\uparrow$ ) | <b>0.820</b> | 0.812                | 0.726  | 0.501      |
| P-AUROC ( $\uparrow$ ) | <b>0.860</b> | 0.855                | 0.759  | 0.477      |

**Chamfer Distance Analysis.** To validate the effectiveness of our geometry and vertex rectification modules, we perform Chamfer Distance (CD) evaluation, a widely adopted metric for assessing point distribution similarity in 3D generation tasks. Specifically, we compute the CD between Geometry-Rectified Noisy Points and the input, as well as between Vertex-Rectified Noisy Points and the input, on the Real 3D-AD dataset. As illustrated in Figure 2, geometry rectification achieves an improvement of approximately 0.6 in the CD score, while vertex rectification provides an additional gain of 0.2, clearly demonstrating the effectiveness of the proposed rectification strategy.

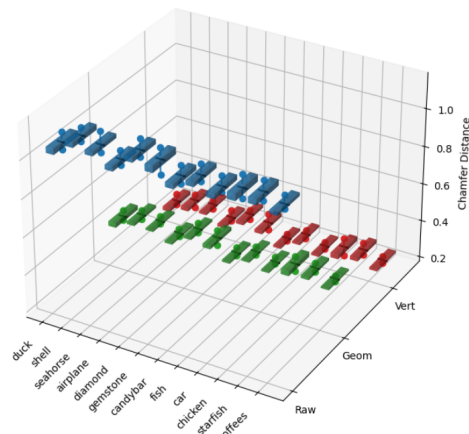

Figure 2. Chamfer Distance Comparison: Noisy-to-Input, Geometry-Rectified Noisy Points-to-Input, and Vertex-Rectified Noisy Points-to-Input on Real 3D AD Datasets. Blue represents standard noise, green denotes Geometry noise and red is Vertex noise.
